# Supplementary material for: YEATS2 links histone acetylation to tumorigenesis of non-small cell lung cancer
Source: PubMed Central journal article supplement (PMC5651844; doi:10.1038/s41467-017-01173-4), 2017-10-20
Supplement: 41467_2017_1173_MOESM3_ESM.pdf [file 41467_2017_1173_MOESM3_ESM.pdf]

## **Description of Additional Supplementary Files**

File Name: Supplementary Data 1

Description: Down regulated genes in YEATS2 KD cells

File Name: Supplementary Data 2

Description: Up regulated genes in YEATS2 KD cells

File Name: Supplementary Data 3

Description: GO analysis

File Name: Supplementary Data 4

Description: ZZZ3 ChIP-seq peaks

File Name: Supplementary Data 5

Description: H3K27ac ChIP-seq peaks

File Name: Supplementary Data 6

Description: H3K9ac ChIP-seq peaks

File Name: Supplementary Data 7

Description: ZZZ3 occupied genes
